# Supplementary material
Source: HighWire-hosted journal article supplement (http://www.cmaj.ca/highwire/filestream/78991/field_highwire_adjunct_files/0/202378-res-1-at.pdf)
Supplement: 202378-res-1-at.pdf [file 202378-res-1-at.pdf]

**Appendix 1 (as supplied by the authors)**

## Supplemental Material

Changes over time in means of suicide in Canada:  
an analysis of mortality data from 1981 to 2018

Li Liu, MSc  
Colin A. Capaldi, PhD  
Heather M. Orpana, PhD  
Mark S. Kaplan, DrPH  
Lil Tonmyr, PhD

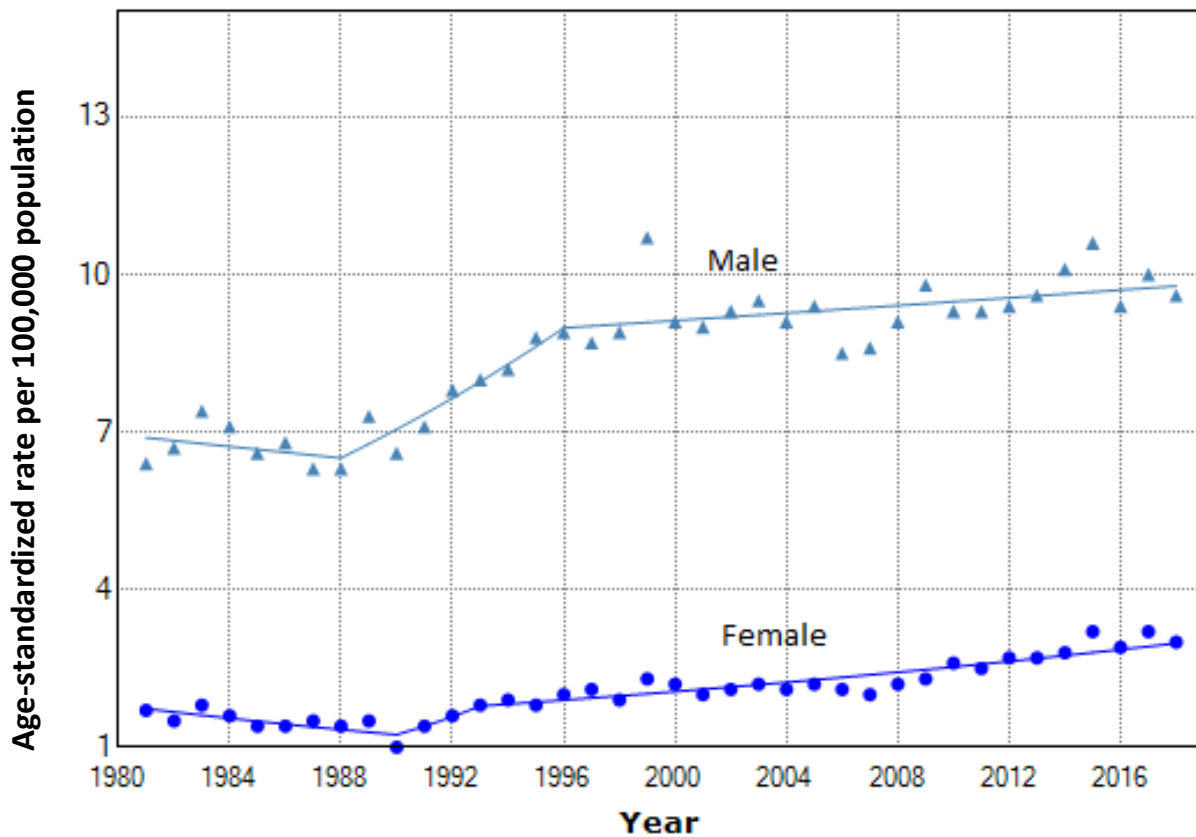

Figure S1. Age-standardized mortality rates of suicide by suffocation, hanging or strangulation by sex in Canada, 1981-2018.

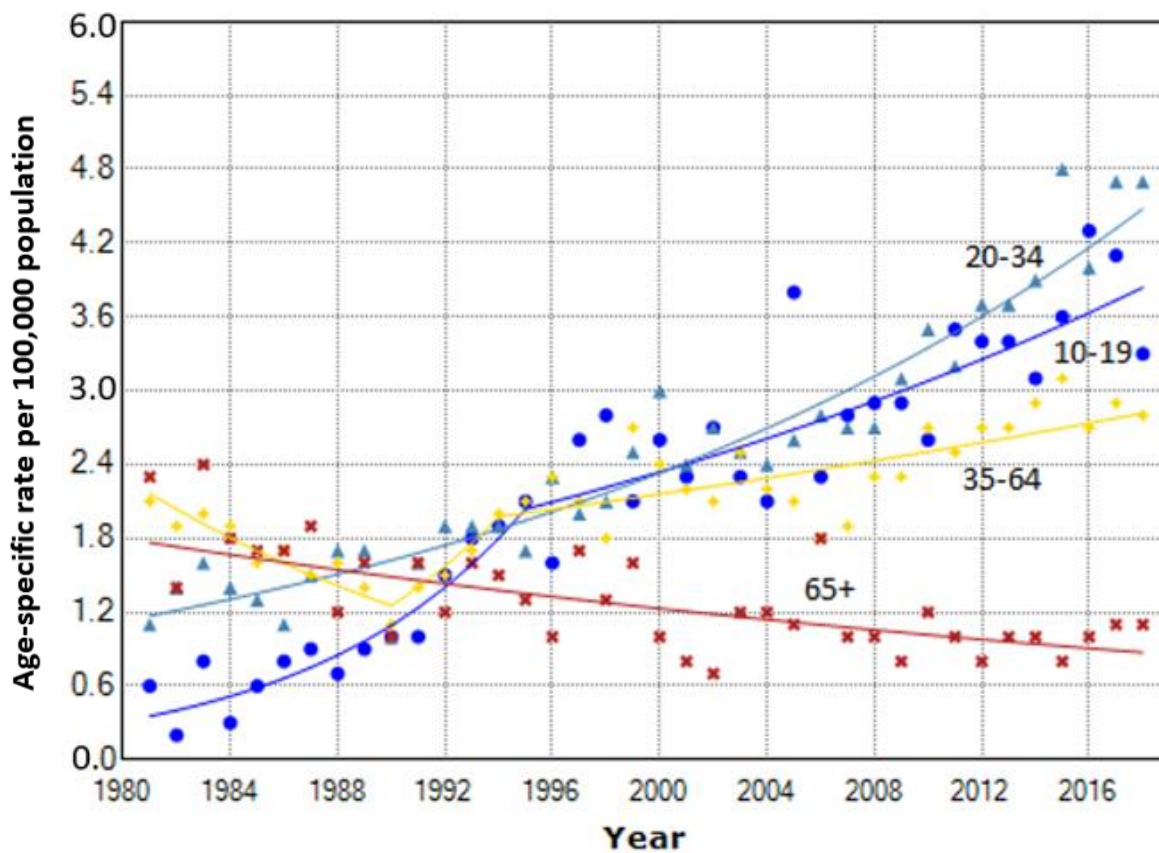

Figure S2. Age-specific mortality rates of suicide by suffocation, hanging or strangulation for females by age group in Canada, 1981-2018.

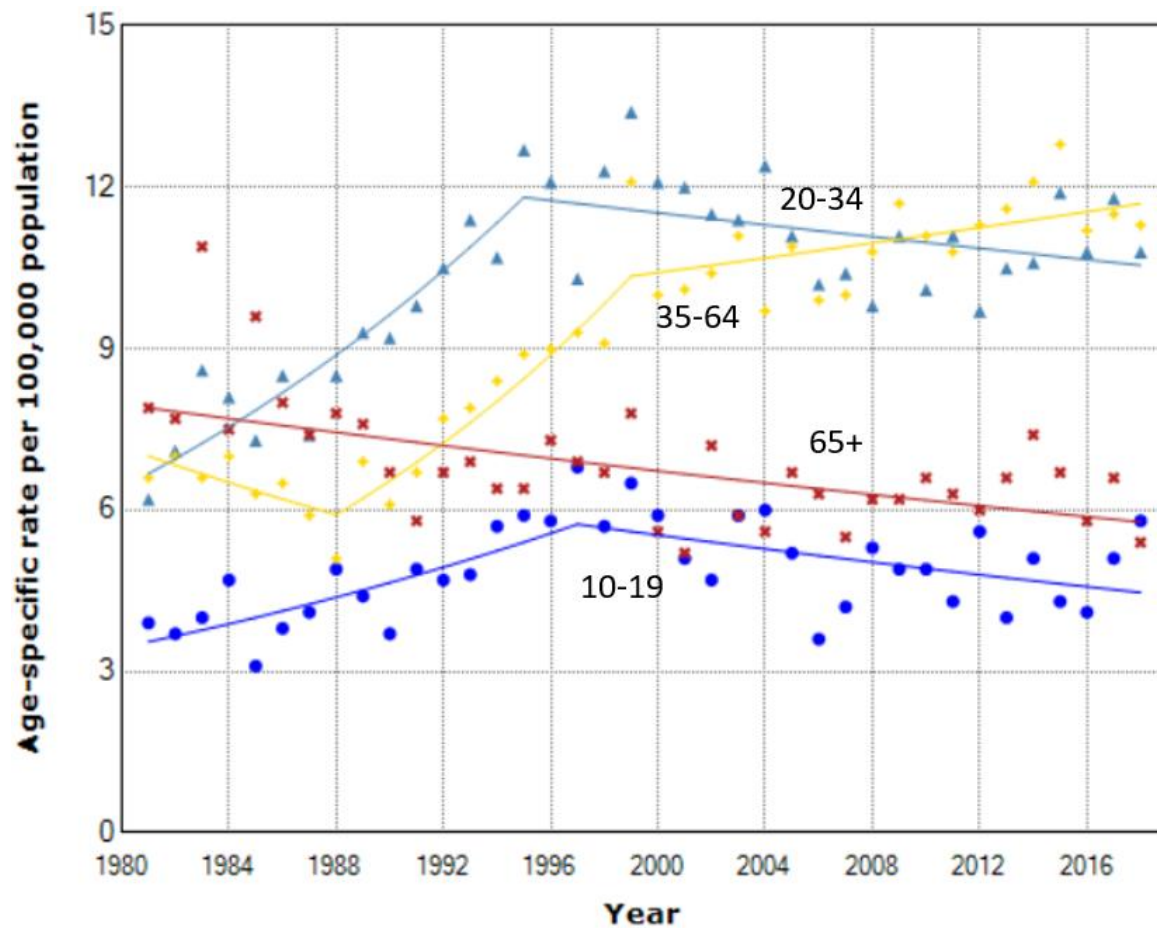

Figure S3. Age-specific mortality rates of suicide by suffocation, hanging or strangulation for males by age group in Canada, 1981-2018.

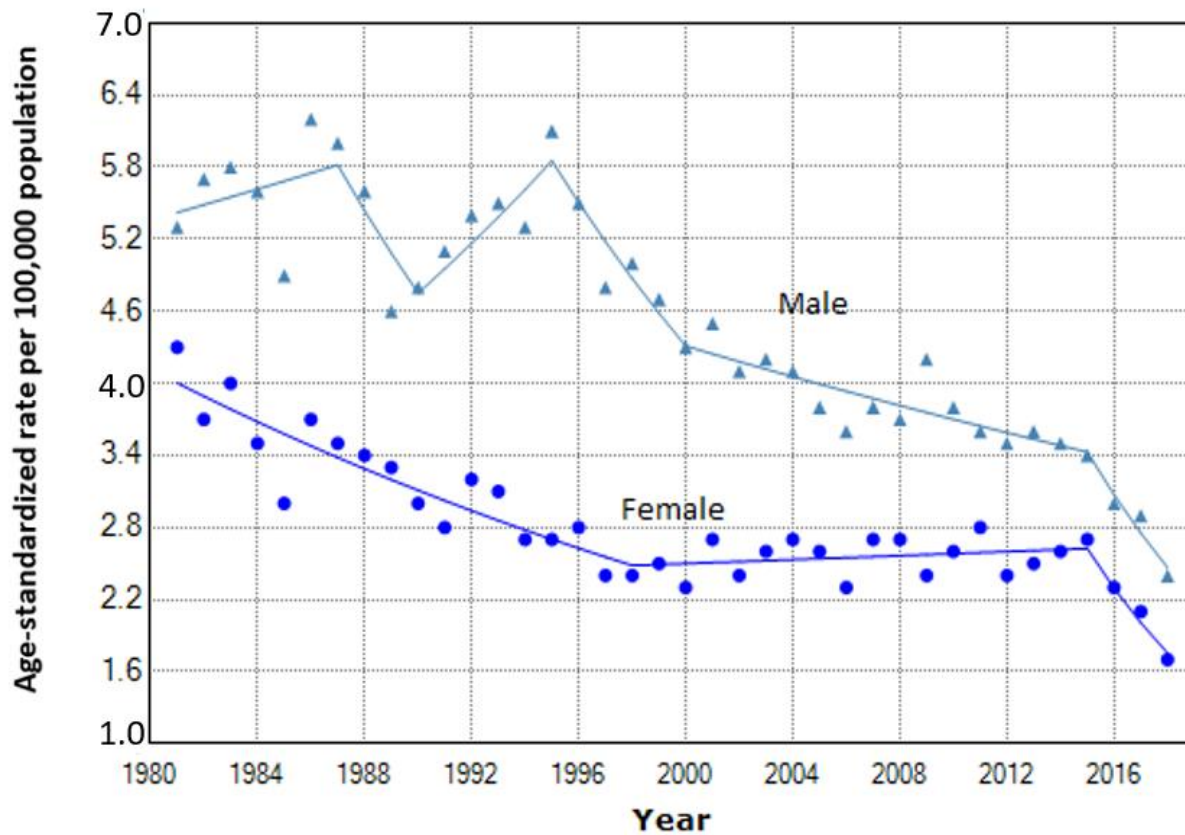

Figure S4. Age-standardized mortality rates of suicide by poisoning by sex in Canada, 1981-2018.

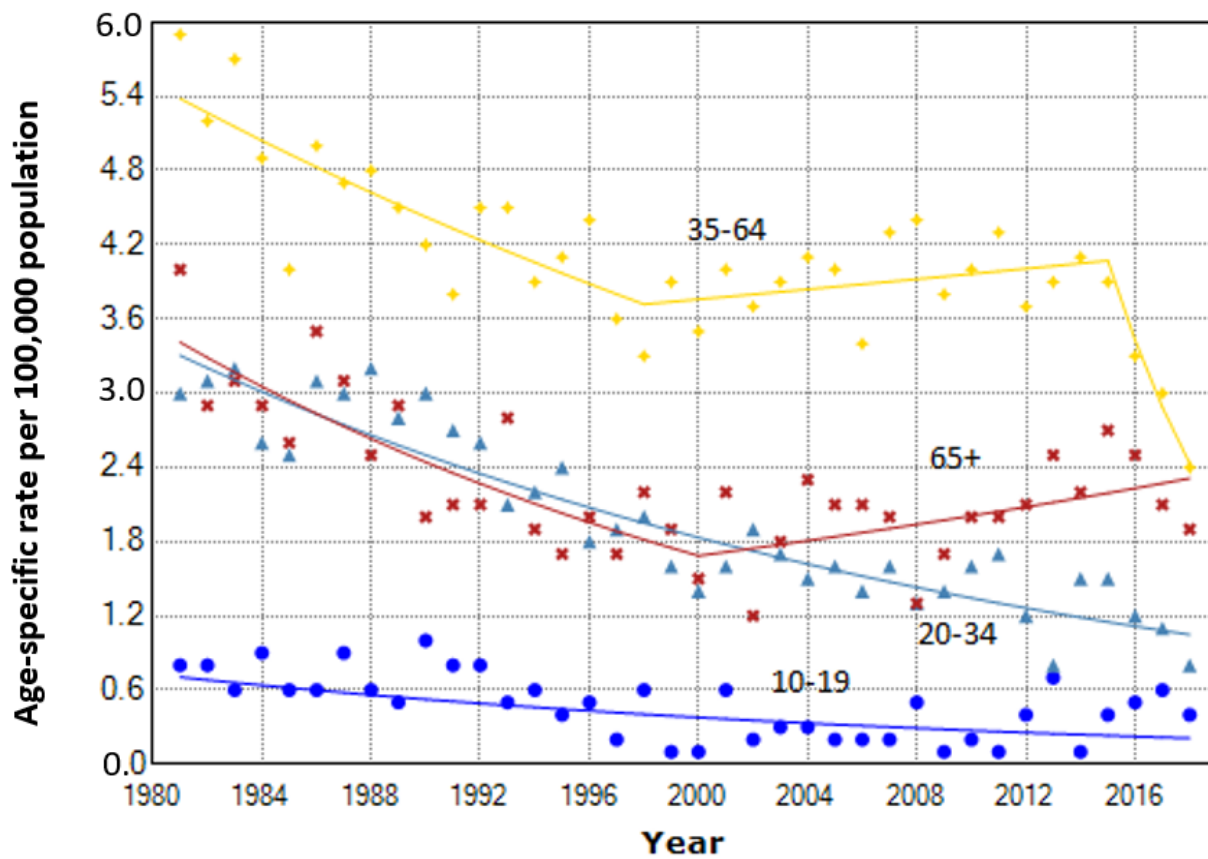

Figure S5. Age-specific mortality rates of suicide by poisoning for females by age group in Canada, 1981-2018.

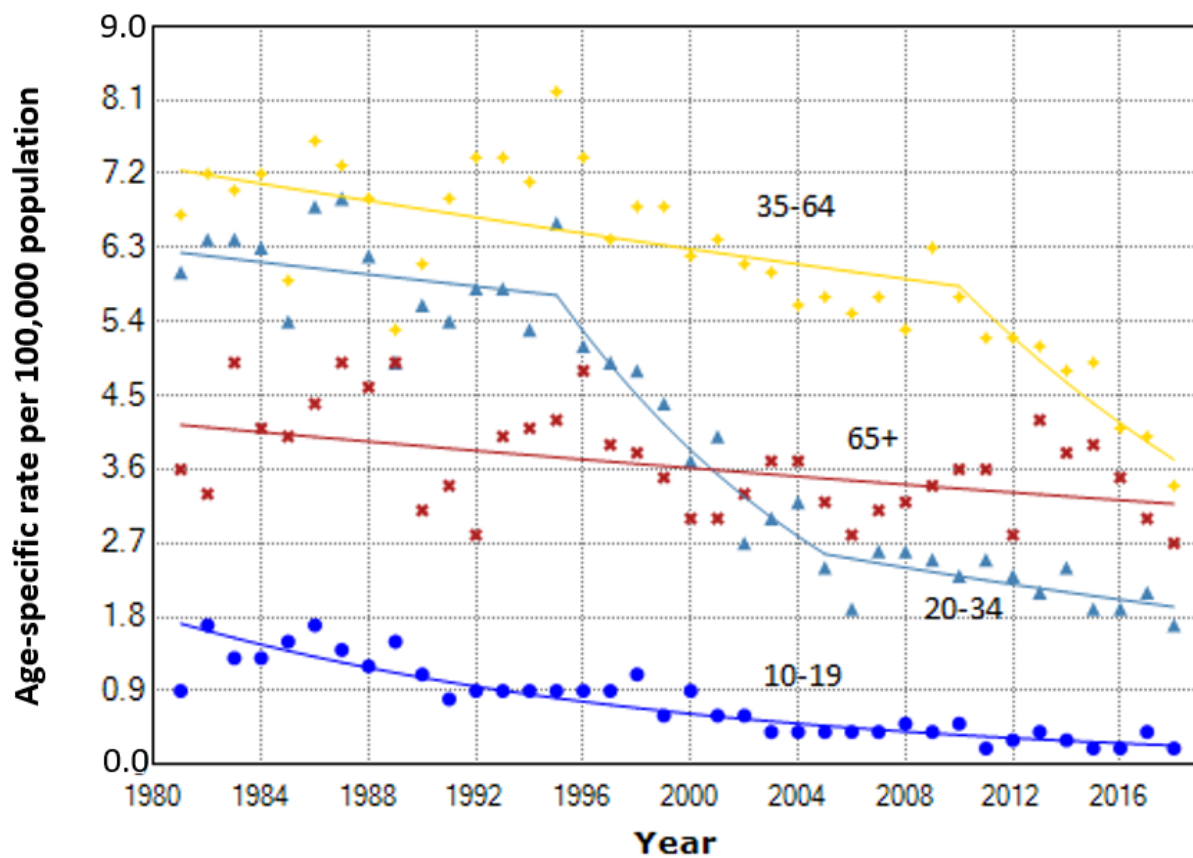

Figure S6. Age-specific mortality rates of suicide by poisoning for males by age group in Canada, 1981-2018.

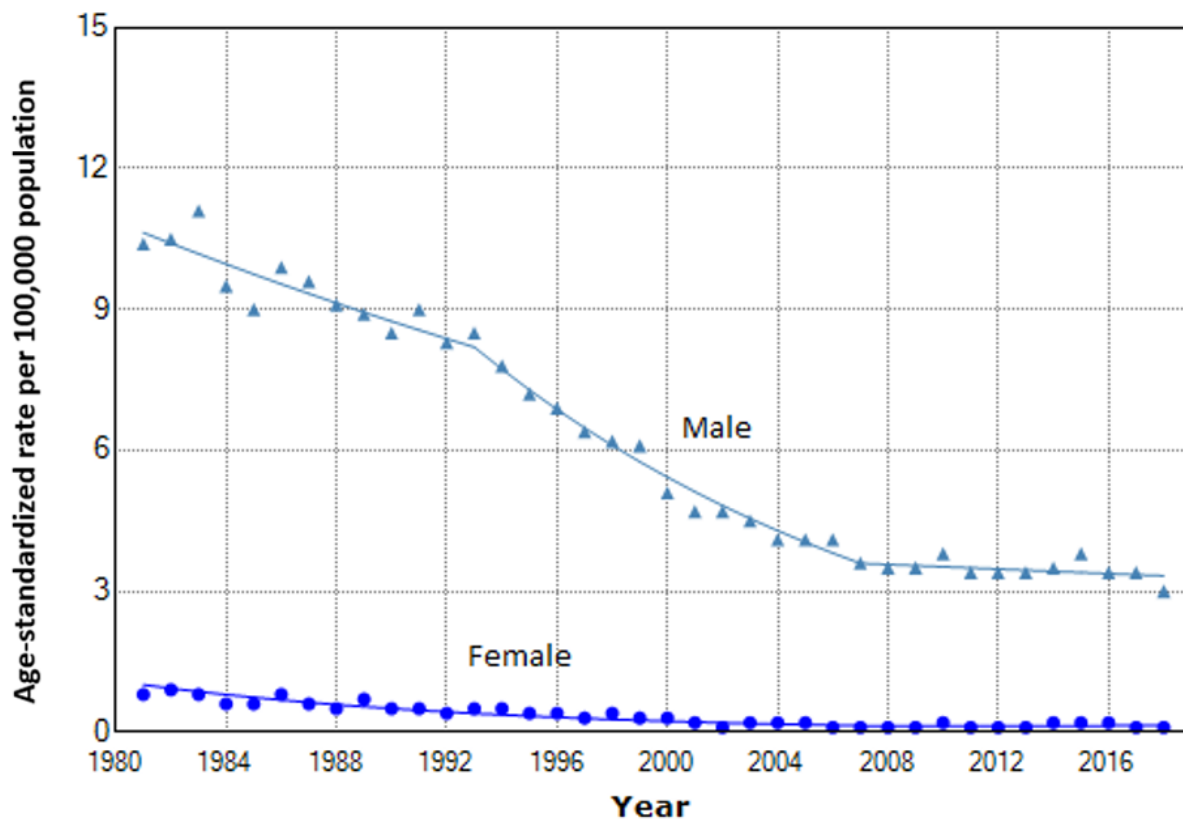

Figure S7. Age-standardized mortality rates of suicide by firearms or explosives by sex in Canada, 1981-2018.



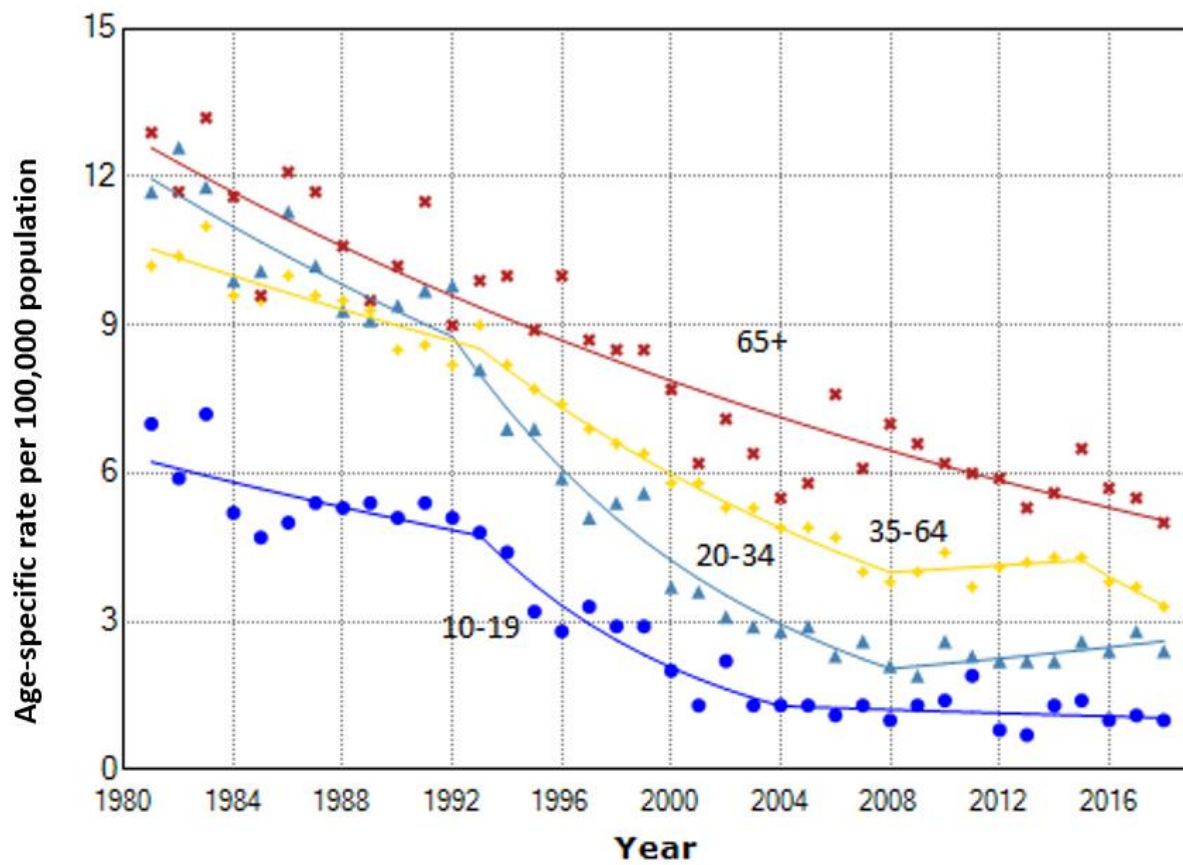

Figure S8. Age-specific mortality rates of suicide by firearms or explosives for males by age group in Canada, 1981-2018.
